# Supplementary material for: A rational design and green synthesis of 3D metal organic frameworks containing a rigid heterocyclic nitrogen-rich dicarboxylate: structural diversity, CO2 sorption and selective sensing of 2,4,6-TNP in water
Source: Royal Society of Chemistry journal article supplement (doi:10.1039/c8dt04474k), 2019-01-01
Supplement: c8dt04474k1.pdf [file c8dt04474k1.pdf]

## Electronic Supplementary Information

**Rational design and green synthesis of 3D metal organic frameworks comprised of a rigid heterocyclic nitrogen-rich dicarboxylate: structural diversity, CO<sub>2</sub> sorption and selective sensing of 2,4,6-TNP in water†**

Alisha Gogia and Sanjay K. Mandal\*

*Department of Chemical Sciences, Indian Institute of Science Education and Research Mohali,  
Sector 81, Manauli PO, S.A.S. Nagar, Mohali, Punjab 140306, INDIA*

\*Author for correspondence:  
Prof. Sanjay K. Mandal, E-mail: sanjaymandal@iisermohali.ac.in.

## Table of Contents

| Item                | Page No.                                                                       |         |
|---------------------|--------------------------------------------------------------------------------|---------|
| <b>Fig. S1</b>      | ORTEP view of asymmetric unit of <b>1</b>                                      | S3      |
| <b>Fig. S2</b>      | ORTEP view of asymmetric unit of <b>2</b>                                      | S3      |
| <b>Table S1</b>     | Selected bond lengths (Å) and bond angles (°) of <b>1</b>                      | S4      |
| <b>Table S2</b>     | Selected bond lengths (Å) and bond angles (°) of <b>2</b>                      | S5      |
| <b>Fig. S3</b>      | FTIR spectrum of <b>1</b>                                                      | S6      |
| <b>Fig. S4</b>      | FTIR spectrum of <b>2</b>                                                      | S7      |
| <b>Fig. S5</b>      | N <sub>2</sub> adsorption isotherm of <b>1</b>                                 | S8      |
| <b>Fig. S6</b>      | N <sub>2</sub> adsorption isotherm of <b>2</b>                                 | S8      |
| <b>Fig. S7-S8</b>   | Calculation of isosteric heat of adsorption of <b>1</b> and <b>2</b>           | S9-S10  |
| <b>Fig. S9</b>      | TGA profiles of <b>1</b> and <b>2</b>                                          | S10     |
| <b>Fig. S10</b>     | PXRD patterns of as-synthesized <b>1</b> and after immersing it in water       | S11     |
| <b>Fig. S11</b>     | Solid state reflectance spectra of H <sub>2</sub> tdz, <b>1</b> , and <b>2</b> | S11     |
| <b>Fig. S12</b>     | Excitation and emission spectra of H <sub>2</sub> tdz                          | S12     |
| <b>Fig. S13</b>     | Excitation and emission spectra of <b>1</b>                                    | S12     |
| <b>Fig. S14-21</b>  | Fluorescence titration curves of <b>1</b> for different NAEs                   | S13-S16 |
| <b>Scheme S1</b>    | Possible interactions between <b>1</b> and TNP                                 | S17     |
| <b>Fig. S22-S24</b> | Stern-Volmer plots of <b>1</b> for TNP, 2,4-DNP, and 4-NP                      | S18-S19 |
| <b>Table S3</b>     | Comparison with literature reports                                             | S20     |
| <b>Fig. S25</b>     | Calculation of detection limit of TNP                                          | S21     |
| <b>Table S4</b>     | Calculation of detection limit of TNP                                          | S21     |
| <b>Table S5</b>     | Lifetime measurement                                                           | S22     |
| <b>Fig. S26</b>     | Recyclability and stability of <b>1</b>                                        | S22     |
| <b>Fig. S27</b>     | <sup>13</sup> C NMR spectrum of H <sub>2</sub> tdz in D <sub>2</sub> O         | S23     |
| <b>Fig. S28</b>     | FTIR spectrum of H <sub>2</sub> tdz                                            | S24     |

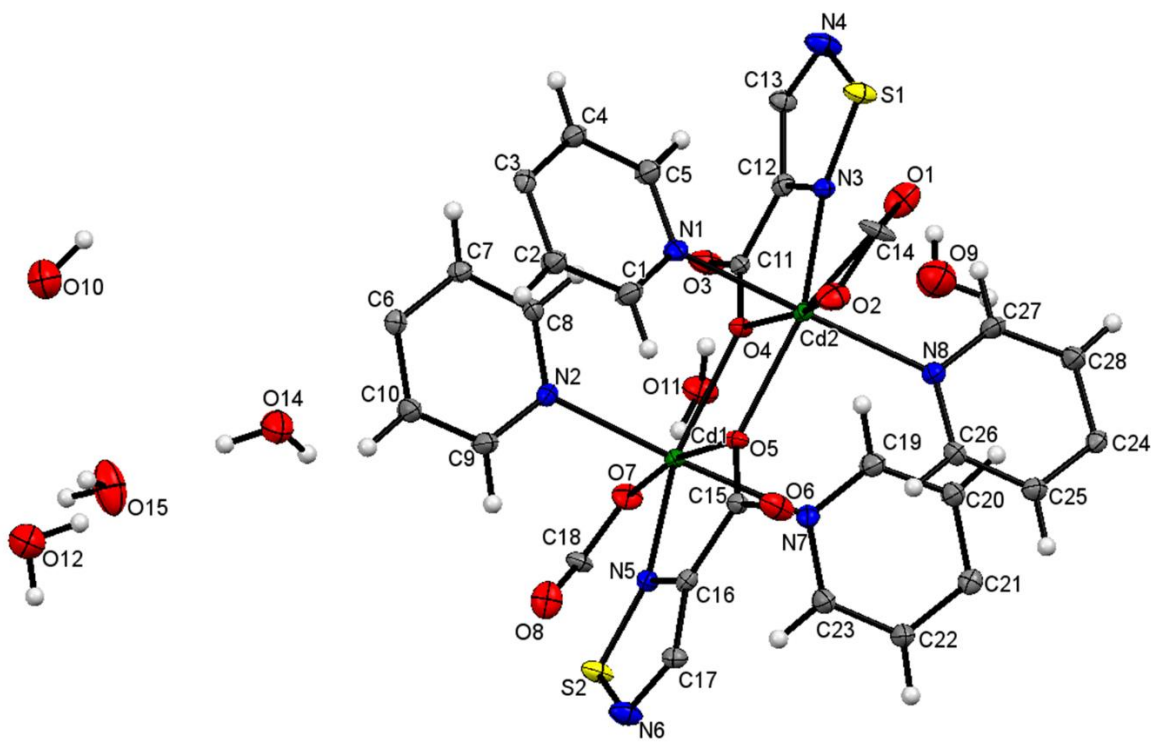

**Fig. S1** ORTEP view of the asymmetric unit in **1**.

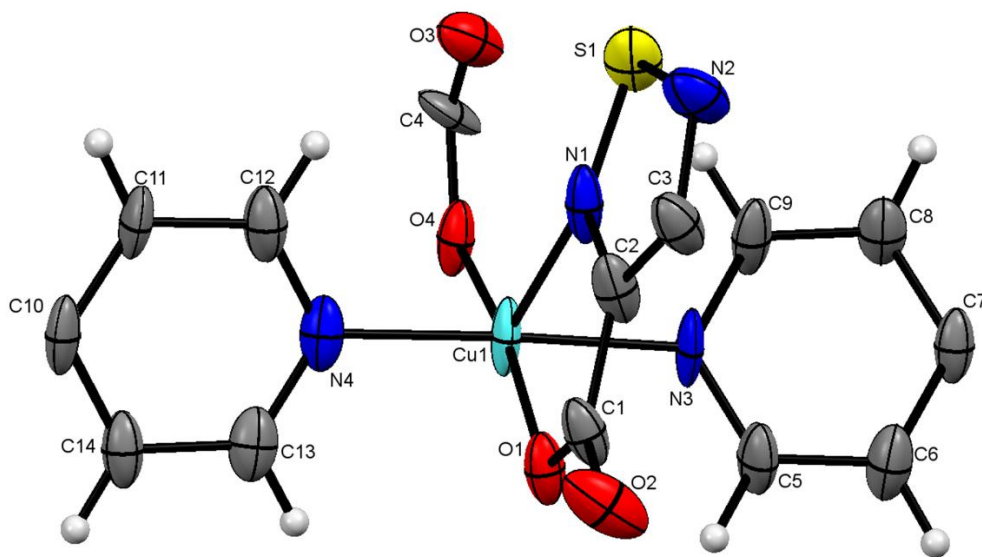

**Fig. S2** ORTEP view of the asymmetric unit in **2**.

**Table S1.** Selected bond lengths (Å) and angles (°) for **1**.

Bond distances (Å)

|        |            |        |            |
|--------|------------|--------|------------|
| Cd1-O7 | 2.2541(19) | Cd1-O4 | 2.2897(17) |
| Cd1-N2 | 2.318(2)   | Cd1-N7 | 2.349(2)   |
| Cd1-N5 | 2.394(2)   | Cd1-O5 | 2.3992(19) |
| Cd2-O5 | 2.2655(17) | Cd2-N8 | 2.298(2)   |
| Cd2-N3 | 2.452(2)   | Cd2-O2 | 2.424(2)   |
| Cd2-O1 | 2.602(2)   | Cd2-O4 | 2.5454(19) |
| Cd2-N1 | 2.314(2)   |        |            |

Bond angles (°)

|           |           |           |           |
|-----------|-----------|-----------|-----------|
| O7-Cd1-O4 | 113.67(7) | O7-Cd1-N2 | 95.04(7)  |
| O4-Cd1-N2 | 89.94(7)  | O7-Cd1-N7 | 87.11(7)  |
| O4-Cd1-N7 | 87.15(7)  | N2-Cd1-N7 | 176.90(8) |
| O7-Cd1-N5 | 104.85(7) | O4-Cd1-N5 | 141.18(7) |
| N2-Cd1-N5 | 91.38(7)  | N7-Cd1-N5 | 90.23(7)  |
| O7-Cd1-O5 | 170.84(6) | O4-Cd1-O5 | 72.30(6)  |
| N2-Cd1-O5 | 91.85(7)  | N7-Cd1-O5 | 86.26(7)  |
| N5-Cd1-O5 | 68.89(7)  | O5-Cd2-N8 | 91.45(7)  |
| O5-Cd2-N1 | 89.68(7)  | N8-Cd2-N1 | 174.22(8) |
| O5-Cd2-O2 | 105.16(7) | N8-Cd2-O2 | 93.97(8)  |
| N1-Cd2-O2 | 80.26(8)  | O5-Cd2-N3 | 134.49(7) |
| N8-Cd2-N3 | 95.09(7)  | N1-Cd2-N3 | 88.15(7)  |
| O2-Cd2-N3 | 119.16(7) | O5-Cd2-O4 | 69.95(6)  |
| N8-Cd2-O4 | 96.50(7)  | N1-Cd2-O4 | 89.22(7)  |
| O2-Cd2-O4 | 168.52(7) | N3-Cd2-O4 | 64.57(6)  |
| O5-Cd2-O1 | 154.93(7) | N8-Cd2-O1 | 81.03(7)  |
| N1-Cd2-O1 | 95.60(7)  | O2-Cd2-O1 | 52.13(7)  |
| N3-Cd2-O1 | 70.31(7)  | O4-Cd2-O1 | 134.42(6) |

**Table S2.** Selected bond lengths (Å) and angles (°) for **2**.

Bond distances (Å)

|        |          |        |          |
|--------|----------|--------|----------|
| Cu1-O4 | 1.963(4) | Cu1-O1 | 1.974(4) |
| Cu1-N4 | 1.992(5) | Cu1-N3 | 1.992(5) |
| Cu1-N1 | 2.327(6) |        |          |

Bond angles (°)

|           |          |           |           |
|-----------|----------|-----------|-----------|
| O4-Cu1-O1 | 167.7(2) | O4-Cu1-N4 | 90.91(19) |
| O1-Cu1-N4 | 88.2(2)  | O4-Cu1-N3 | 90.39(19) |
| O1-Cu1-N3 | 90.1(2)  | N4-Cu1-N3 | 177.6(3)  |
| O4-Cu1-N1 | 113.3(2) | O1-Cu1-N1 | 79.01(19) |
| N4-Cu1-N1 | 94.1(2)  | N3-Cu1-N1 | 87.2(2)   |

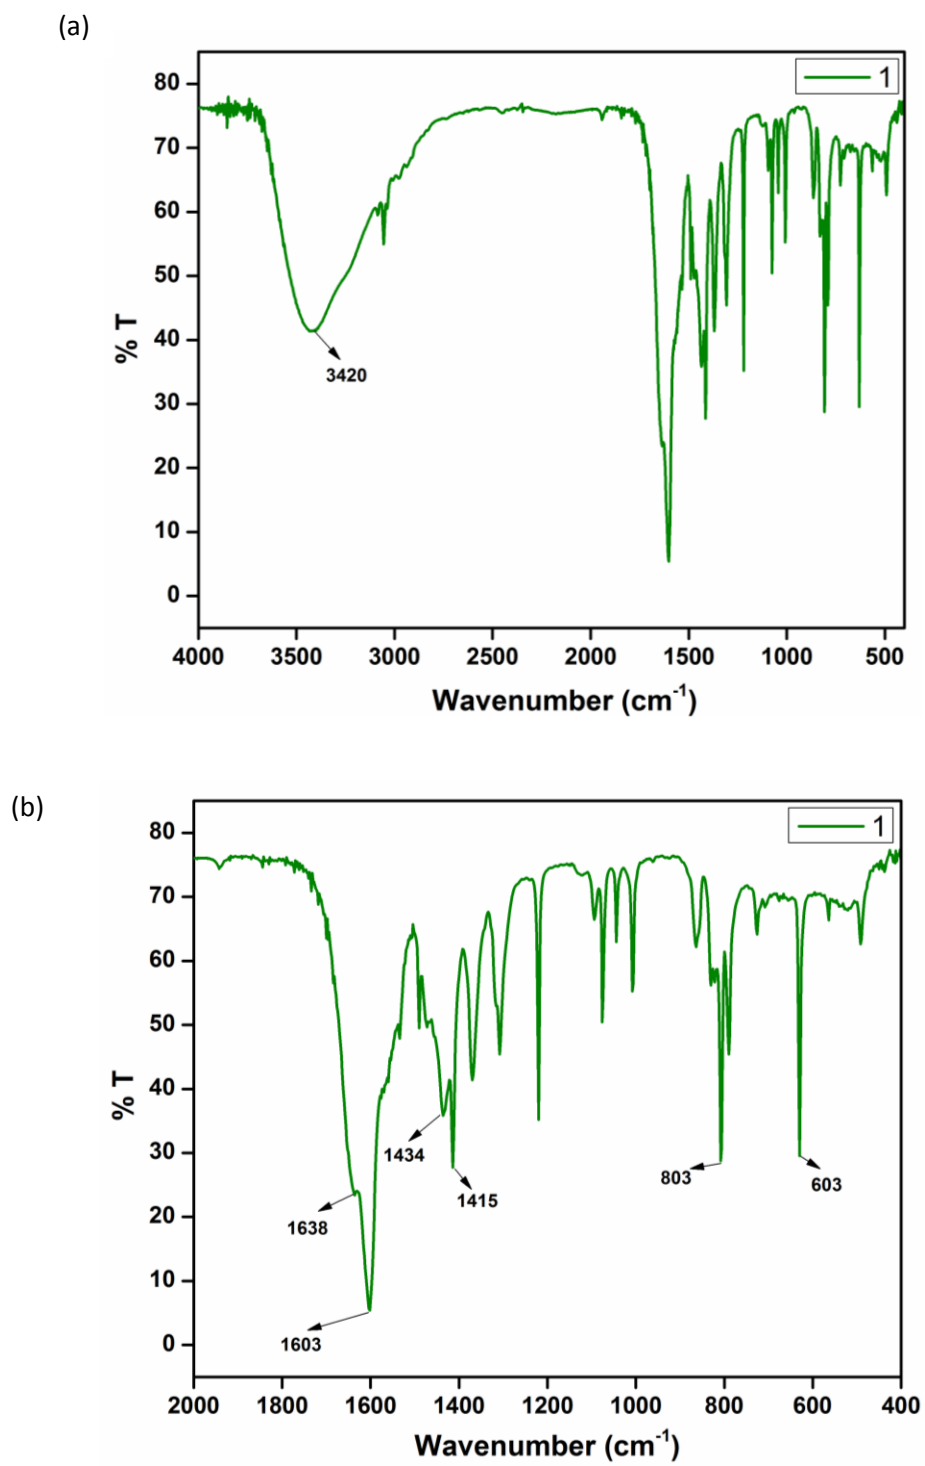

**Fig. S3** (a) Full and (b) expanded region of the FTIR spectrum of **1**.

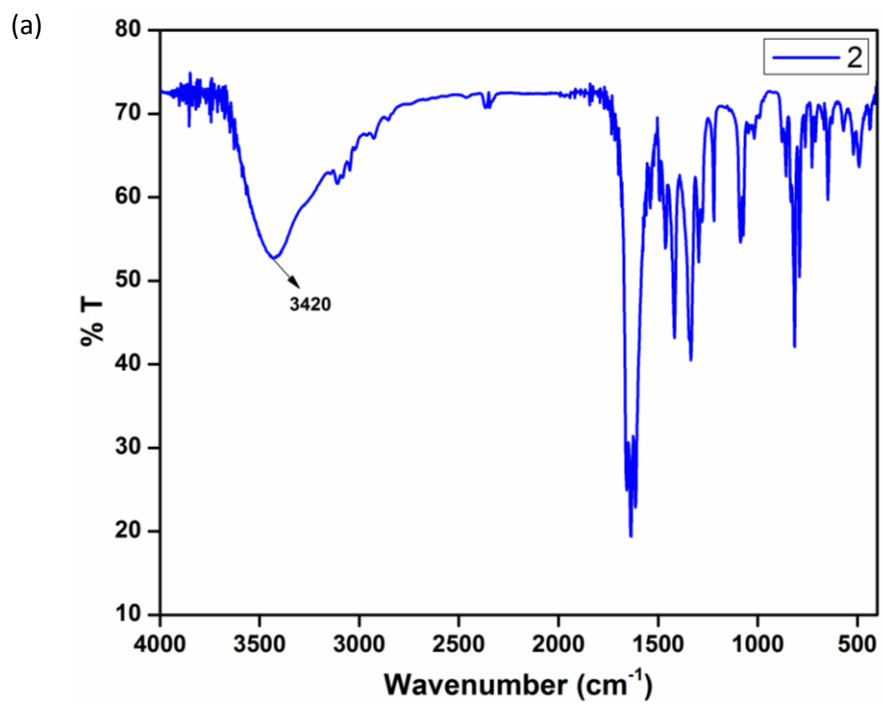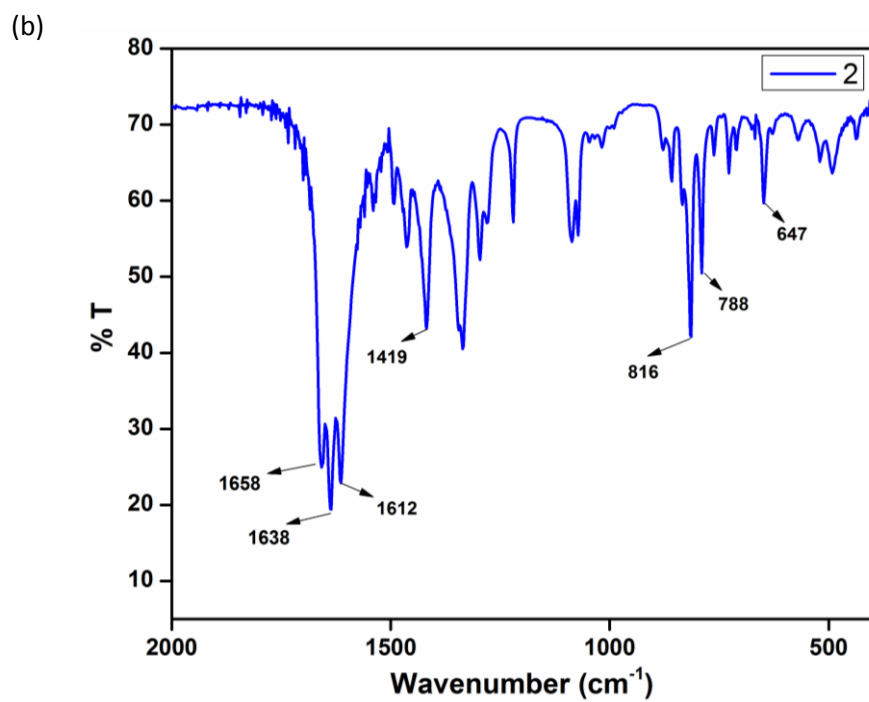

**Fig. S4** (a) Full and (b) expanded region of the FTIR spectrum of **2**.

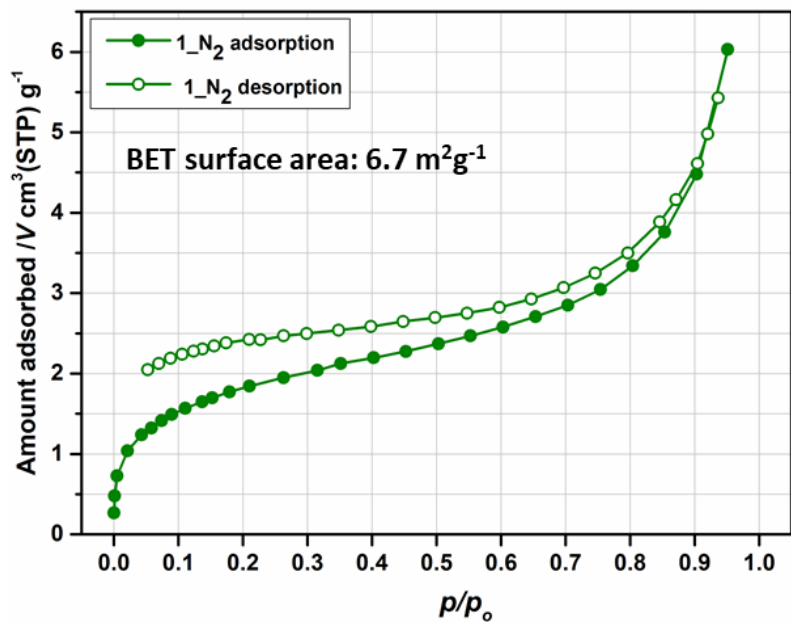

Fig. S5 N<sub>2</sub> adsorption isotherm of **1** at 77 K.

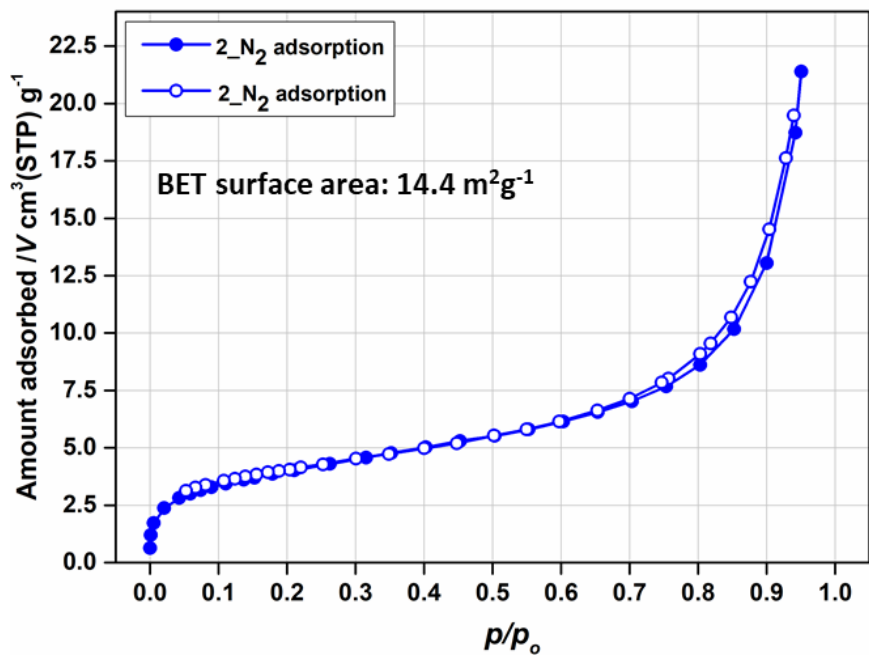

Fig. S6 N<sub>2</sub> adsorption isotherm of **2** at 77 K.



## Calculation of isosteric heat of adsorption

A virial-type expression consisting of the temperature dependent virial parameters  $a_i$  and  $b_i$  were employed to calculate the isosteric heat of adsorption for CO<sub>2</sub> at 263 K, 273 K and 298 K. The virial type expression is given below:

$$\ln(P) = \ln(N) + \frac{1}{T} \sum_{i=0}^m a_i N^i + \sum_{j=0}^n b_j N^j$$

where,  $P$  is the pressure expressed in Torr,  $N$  is the amount adsorbed in mmol/g,  $T$  is the temperature in K,  $a_i$  and  $b_i$  is the virial coefficients, and  $m$ ,  $n$  represent the number of coefficients required to adequately describe the isotherms ( $m$  and  $n$  were gradually increased until the contribution of  $a$  and  $b$  coefficients added further were negligible towards the overall final fit, and the average value of the squared deviations from the experimental values was minimized). The values of the virial coefficient  $a_0$  to  $a_i$  were taken to calculate the isosteric heat of adsorption using the following expression.

$$Q_{st} = -R \sum_{i=0}^m a_i N^i$$

$Q_{st}$  is the coverage dependent isosteric heat of adsorption and  $R$  is the universal gas constant. At zero loading, the isosteric heat of adsorption ( $Q_{st}$ ) for **1** and **2** are found to be 29.1 kJmol<sup>-1</sup> and 23.4 kJmol<sup>-1</sup>, respectively.

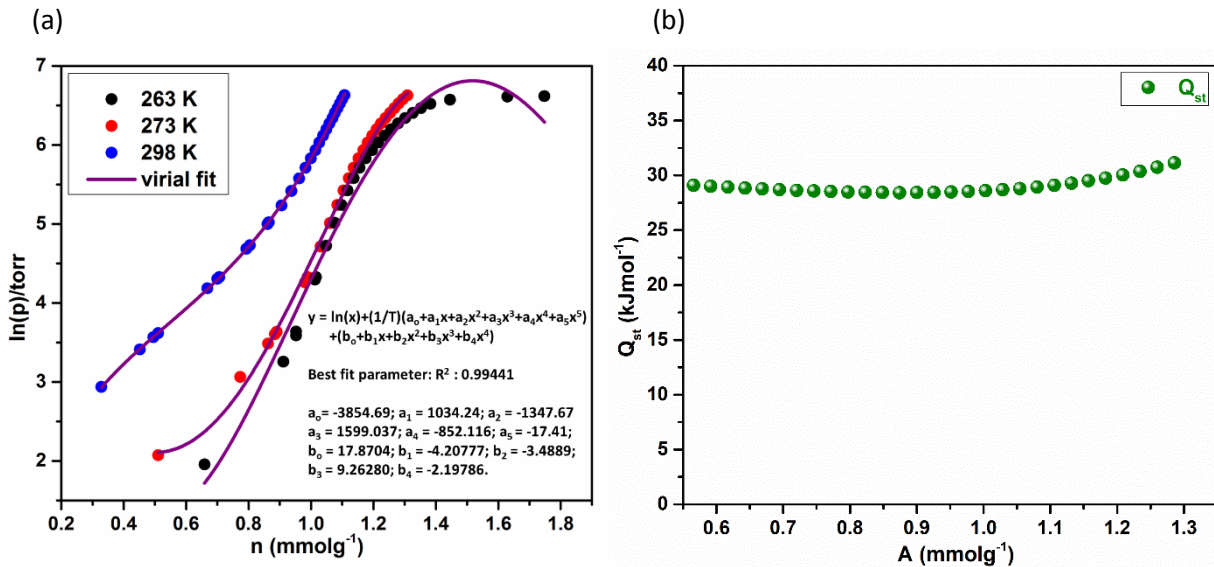

**Fig. S7** Fitting (violet solid lines) of the CO<sub>2</sub> adsorption isotherms for **1** measured at 263 K (black circle), 273 K (red circle), and 298 K (blue circle) using the virial method to estimate the  $Q_{st}$  value.

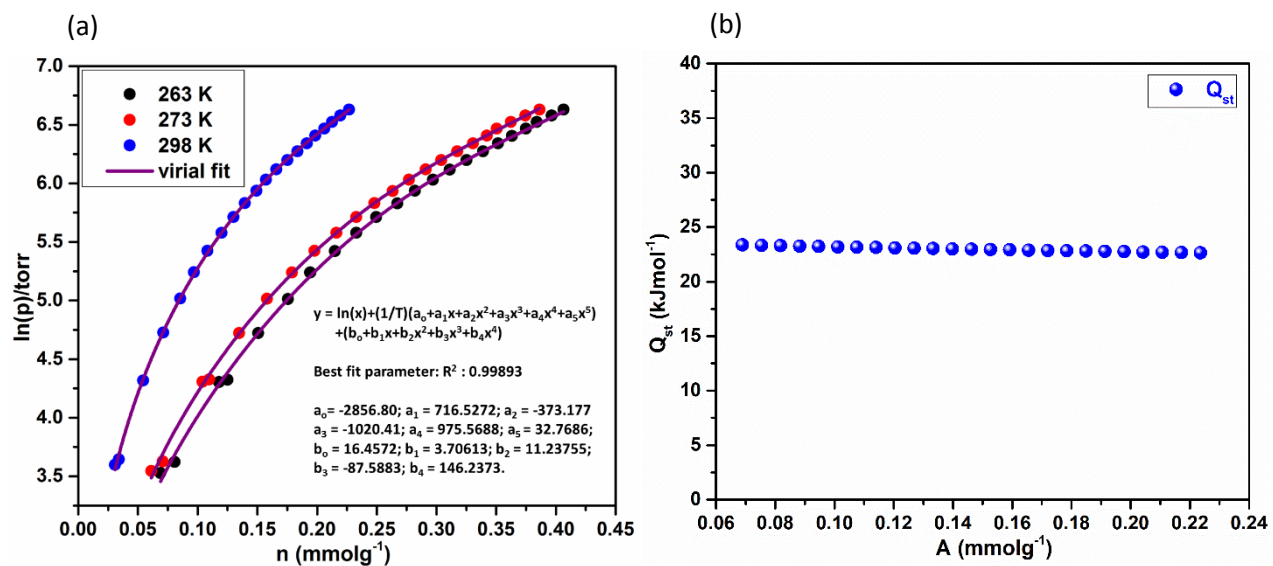

**Fig. S8** Fitting (violet solid lines) of the CO<sub>2</sub> adsorption isotherms for **2** measured at 263 K (black circle), 273 K (red circle), and 298 K (blue circle) using the virial method to estimate the  $Q_{\text{st}}$  value.

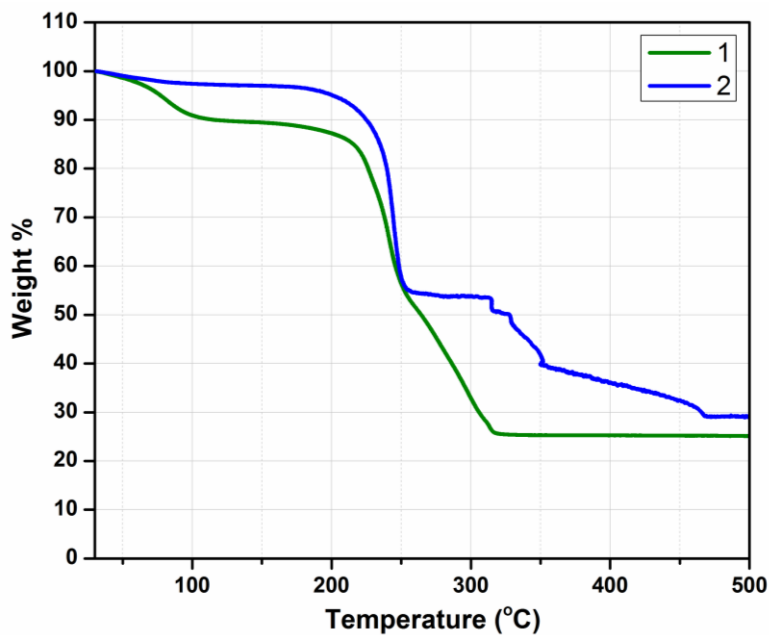

**Fig. S9** TGA profiles of **1** and **2**.

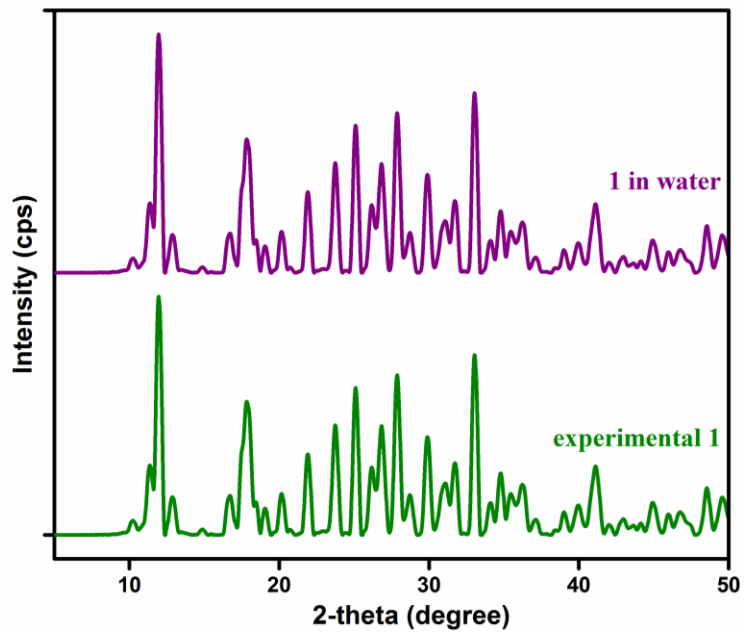

**Fig. S10** PXR D patterns of as-synthesized **1** and after immersing it in water.

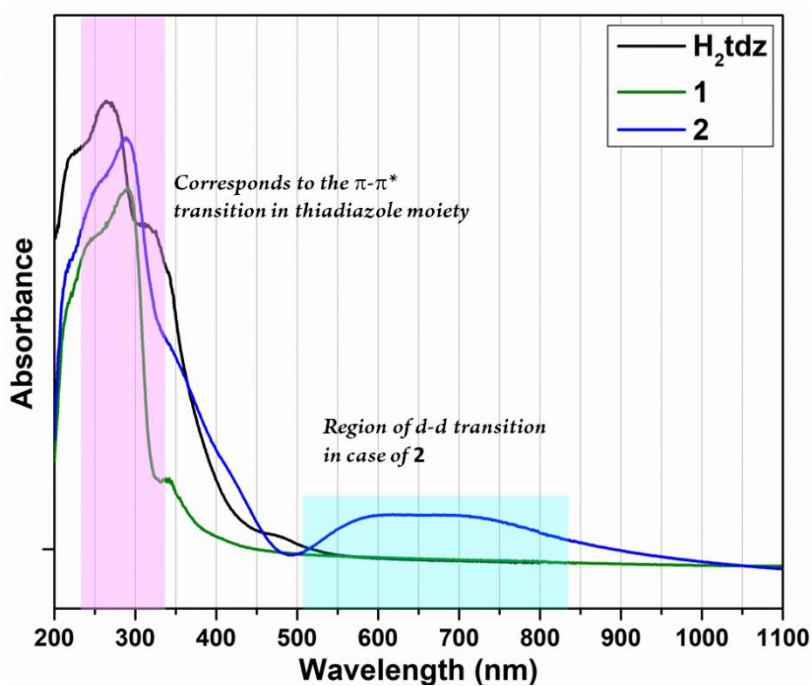

**Fig. S11** Solid-state reflectance spectra of **1** and **2**.

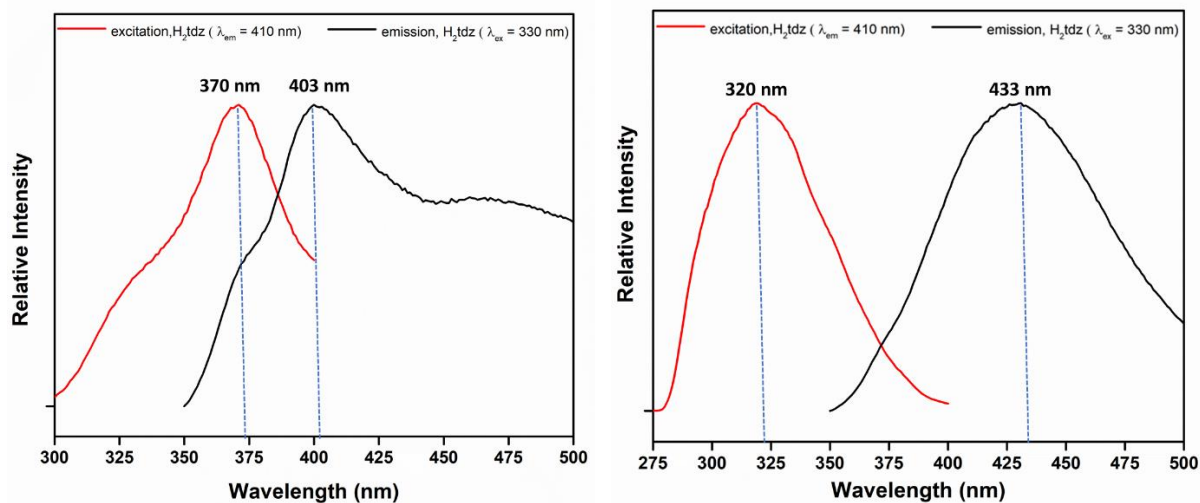

**Fig. S12** Excitation and emission spectra of H<sub>2</sub>tdz in solid-state (left) and in water (right).

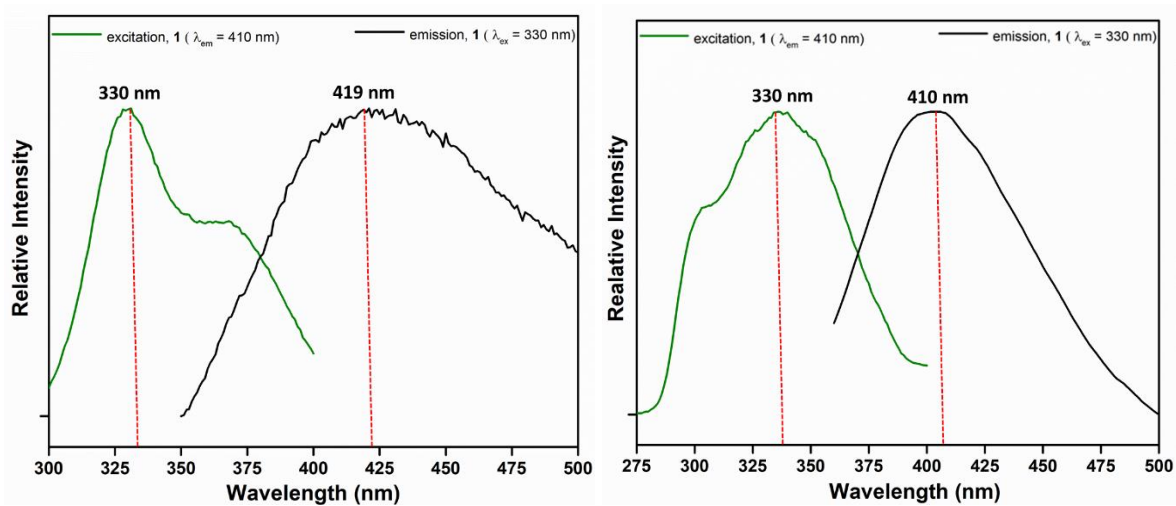

**Fig. S13** Excitation and emission spectra of **1** in solid-state (left) and dispersed in water (right).

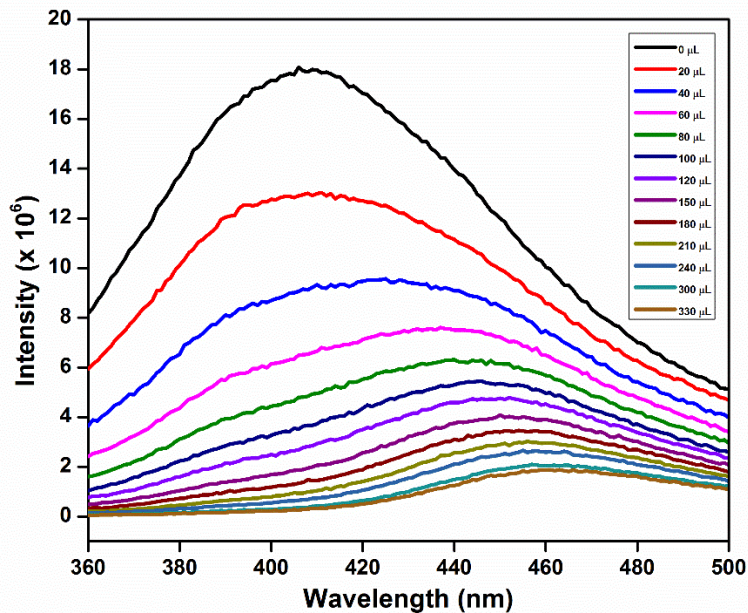

**Fig. S14** Change in emission spectra of **1** dispersed in water upon incremental addition of 2,4-DNP solution (2 mM) in water.

---

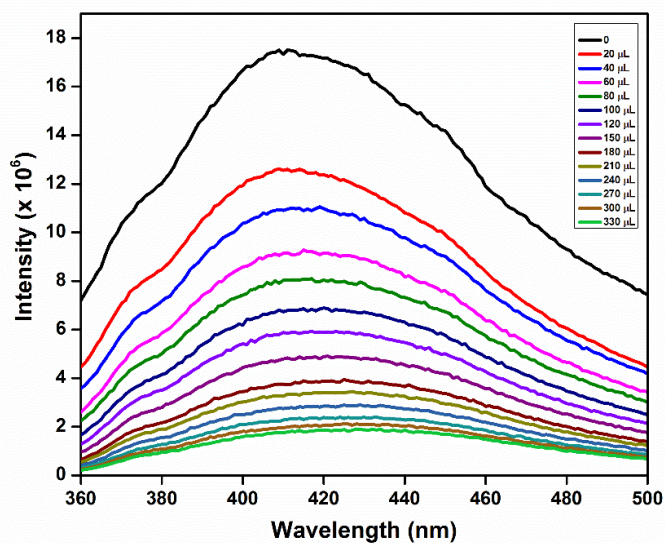

**Fig. S15** Change in emission spectra of **1** dispersed in water upon incremental addition of 4-NP solution (2 mM) in water.

---



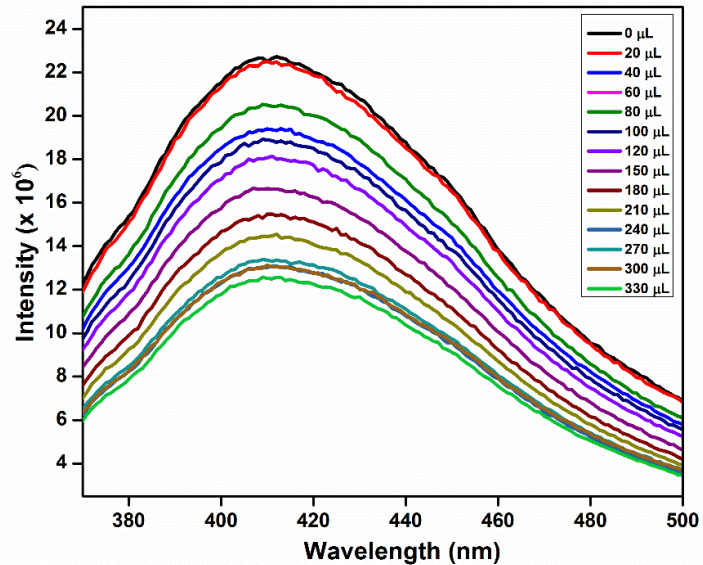

**Fig. S16** Change in emission spectra of **1** dispersed in water upon incremental addition of TNT solution (2 mM) in water.

---

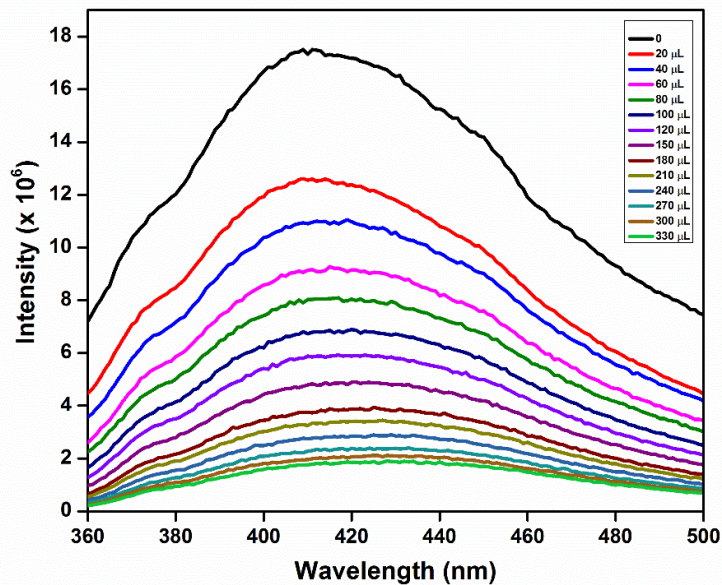

**Fig. S17** Change in emission spectra of **1** dispersed in water upon incremental addition of 2,6-DNT solution (2 mM) in water.

---

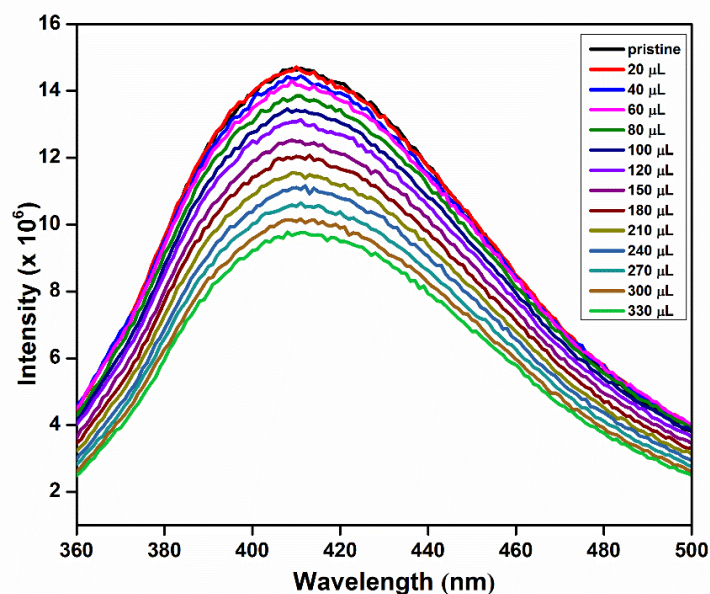

**Fig. S18** Change in emission spectra of **1** dispersed in water upon incremental addition of 2,4-DNT solution (2 mM) in water.

---

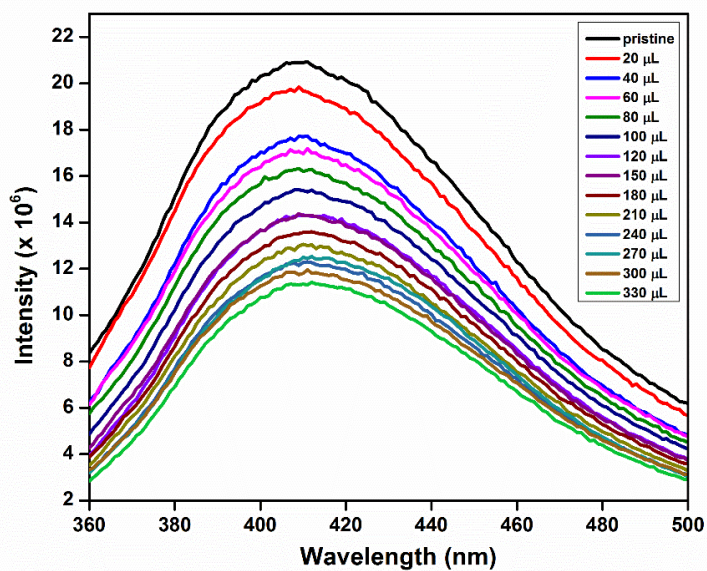

**Fig. S19** Change in emission spectra of **1** dispersed in water upon incremental addition of 1,3-DNB solution (2 mM) in water.

---

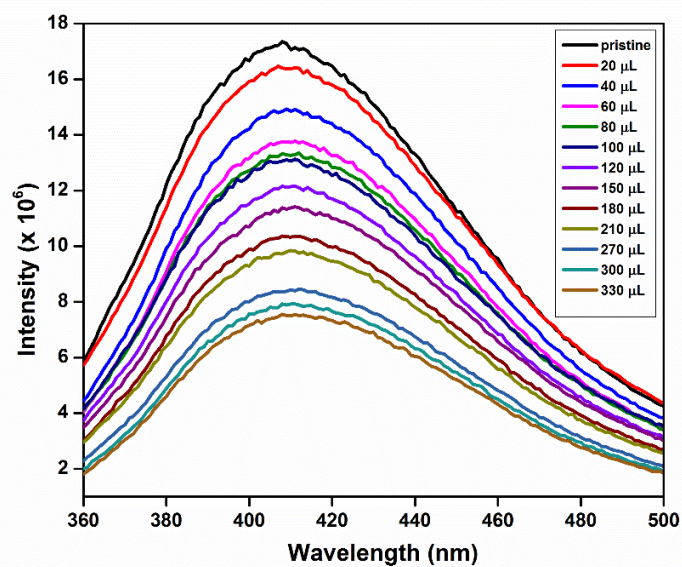

**Fig. S20** Change in emission spectra of **1** dispersed in water upon incremental addition of NB solution (2 mM) in water.

---

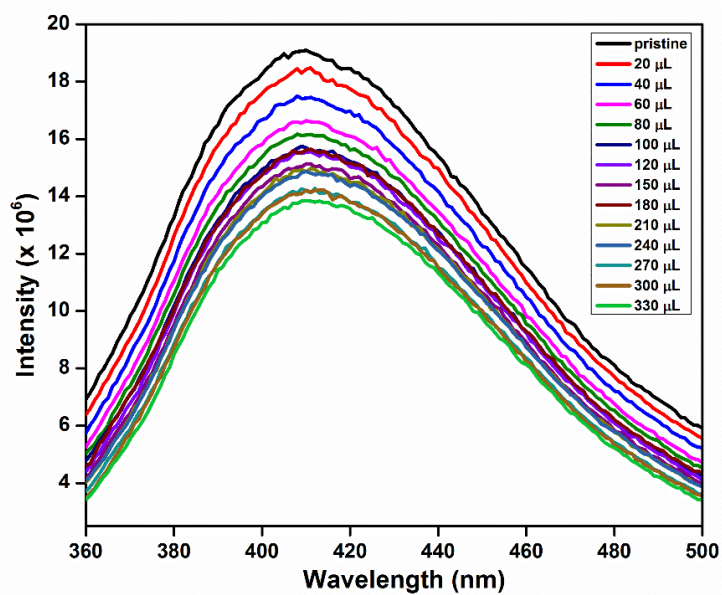

**Fig. S21** Change in emission spectra of **1** dispersed in water upon incremental addition of NM solution (2 mM) in water.

---



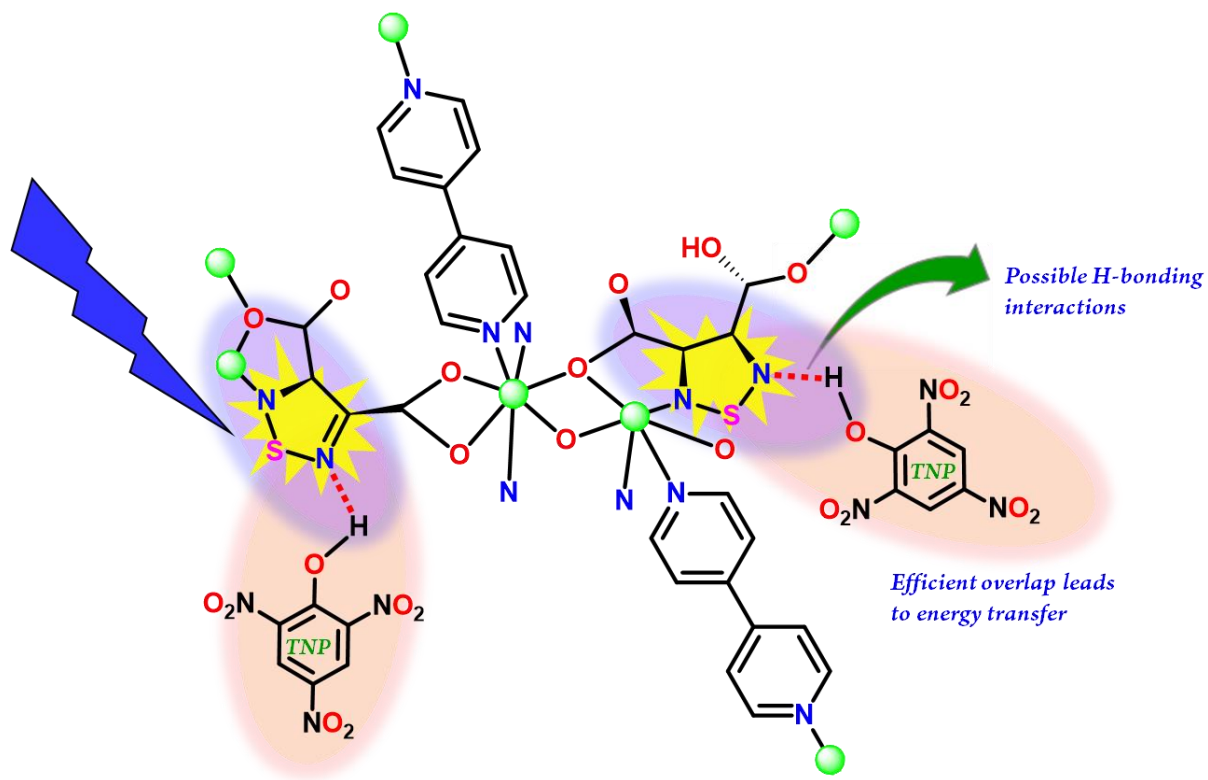

**Scheme S1** Possible H-bonding interactions between the thiadiazole moiety in **1** and TNP molecules.

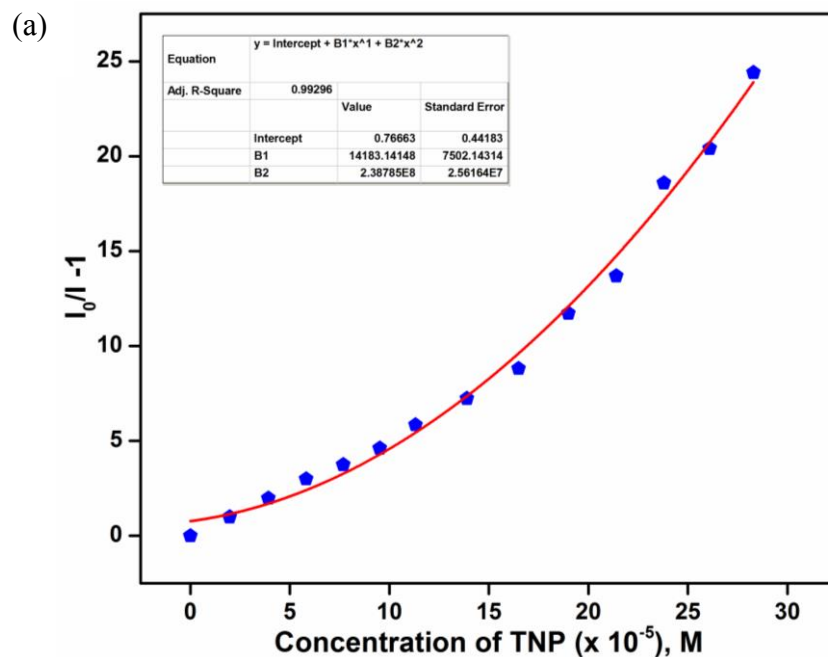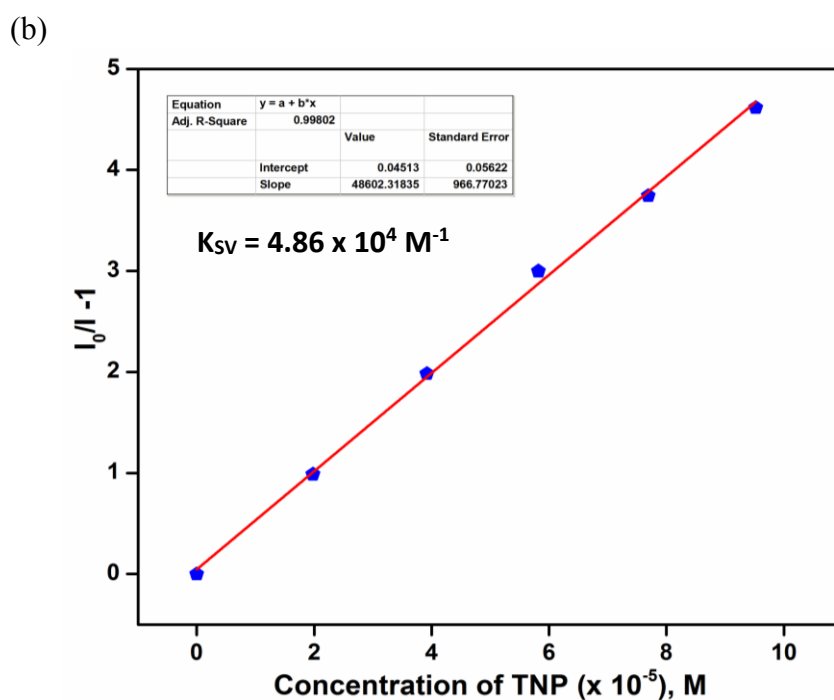

**Fig. S22** Stern-Volmer (SV) plot of **1** for TNP. The relative fluorescence intensity is linear with TNP concentration in the lower region,  $I_0/I = 1 + 48602.32[\text{TNP}]$  ( $R^2 = 0.998$ ).

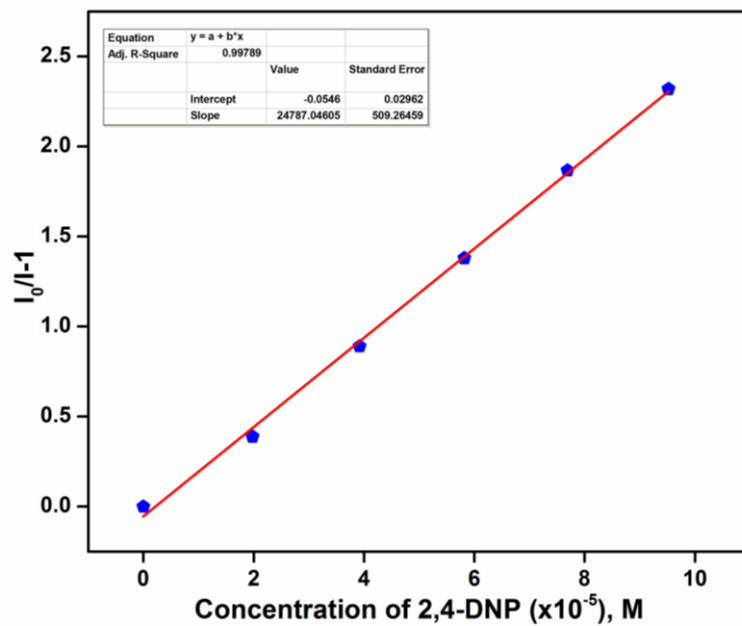

**Fig. S23** Stern-Volmer (SV) plot of **1** for 2,4-DNP. The relative fluorescence intensity is linear with TNP concentration in the lower region,  $I_0/I = 1 + 24787.05[2,4\text{-DNP}]$  ( $R^2 = 0.998$ ).

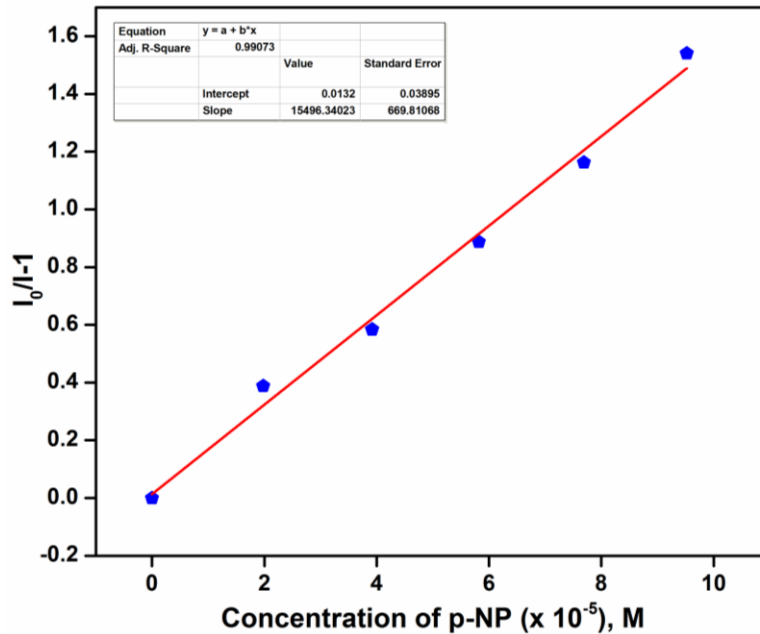

**Fig. S24** Stern-Volmer (SV) plot of **1** for 4-NP. The relative fluorescence intensity is linear with TNP concentration in the lower region,  $I_0/I = 1 + 15496.34[4\text{-NP}]$  ( $R^2 = 0.991$ ).

**Table S3.** Comparison of literature reports for MOFs as sensors of NAEs.

| MOF                                                                                                   | $K_{SV}$ ( $M^{-1}$ )                             | Detection Limit                  | Medium           | Reference                                                |
|-------------------------------------------------------------------------------------------------------|---------------------------------------------------|----------------------------------|------------------|----------------------------------------------------------|
| $\{[Cd_2(tdz)_2(4,4'-bpy)_2] \cdot 6.5H_2O\}_n$ (1)                                                   | $4.86 \times 10^4$                                | $6.3 \times 10^{-6}$ M (1.4 ppm) | H <sub>2</sub> O | <b>This work</b>                                         |
| $[Zr_6O_4(OH)_4(BTDB)_6] \cdot 8H_2O \cdot 6DMF$                                                      | $2.49 \times 10^4$                                | $1.63 \times 10^{-6}$ M          | MeOH             | <i>CrystEngComm</i> , 2016, <b>18</b> , 3104–3113.       |
| $\{[Cd(BIDPT)(oba)] \cdot 0.5H_2O\}_n$ (1)<br>and<br>$\{[Zn(BIDPT)(4,4'-sdb)] \cdot 2.25H_2O\}_n$ (2) | $2.33 \times 10^4$<br>and<br>$2.78 \times 10^4$   | NA<br>NA                         | DMF              | <i>Inorg. Chem. Commun.</i> , 2016, <b>66</b> , 51–54.   |
| $[Zn_4(DMF)(Ur)_2(2,6-NDC)_4]_n$                                                                      | $10.83 \times 10^4$                               | NA<br>1.63 ppm                   | H <sub>2</sub> O | <i>Cryst. Growth Des.</i> , 2015, <b>15</b> , 4627–4634. |
| $Zr_6O_4(OH)_4(L)_6$                                                                                  | $2.9 \times 10^4$                                 | $2.6 \times 10^{-6}$ M           | H <sub>2</sub> O | <i>Chem. Commun.</i> , 2014, <b>50</b> , 8915–8918.      |
| $[Cd_3(TPT)_2(DMF)_2] \cdot 0.5H_2O]_n$                                                               | $6.56 \times 10^4$                                | NA                               | EtOH             | <i>Dalton Trans.</i> , 2015, <b>44</b> , 230–236.        |
| $[Zn_2(NDC)_2(bpy)] \cdot Gx$                                                                         | $0.4 \times 10^4$                                 | NA                               | EtOH             | <i>J. Mater. Chem. C</i> , 2014, <b>2</b> , 10073–10081. |
| $\{Zn_2(tpbn)(2,6-NDC)_2\}_n$ (1)<br>and<br>$\{[Zn_2(tpbn)(2,6-NDC)_2] \cdot 4H_2O\}_n$ (2)           | $5.907 \times 10^3$<br>and<br>$2.464 \times 10^3$ | 11 ppm<br>and<br>19 ppm          | H <sub>2</sub> O | <i>Inorg. Chem.</i> , 2017, <b>56</b> , 14556–14566.     |
| $[Zn_2(L)_2(dpyb)]_n$ (MOF-1)<br>and<br>$[Zn(L)(dipb)](H_2O)_2$ (MOF-2)                               | $2.40 \times 10^4$<br>and<br>$2.46 \times 10^4$   | NA                               | DMA              | <i>Chem. Commun.</i> , 2015, <b>51</b> , 8300–8303.      |
| $[Zr_6O_4(OH)_6(L)_6]_n$                                                                              | $5.8 \times 10^4$                                 | 0.4 ppm                          | H <sub>2</sub> O | <i>Dalton Trans.</i> , 2015, <b>44</b> , 15175–15180.    |
| $[Tb(1,3,5-BTC)]_n$                                                                                   | $3.4 \times 10^4$                                 | $8.1 \times 10^{-8}$ M           | EtOH             | <i>J. Mater. Chem. A</i> , 2013, <b>1</b> , 8745–8752.   |
| $[La(TPT)(DMSO)_2] \cdot H_2O$                                                                        | $9.89 \times 10^4$                                | NA                               | EtOH             | <i>Dalton Trans.</i> , 2015, <b>44</b> , 13340–13346.    |

NA: Not applicable/not mentioned in the reports.

### Calculation of detection limit

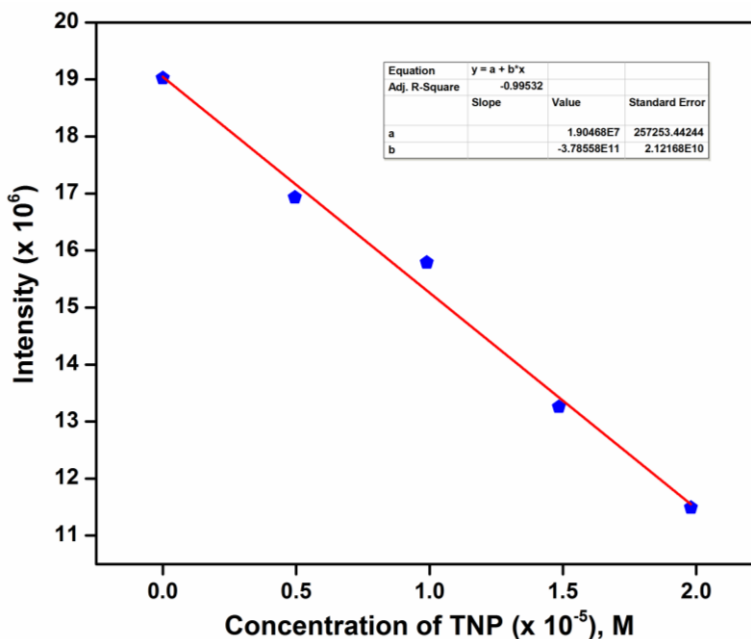

**Fig. S25** Linear region of fluorescence intensity of probe upon addition of TNP to **1** at  $\lambda_{em} = 410 \text{ nm}$  ( $\lambda_{ex} = 310 \text{ nm}$ ) ( $R^2 = 0.995$ ).

**Table S4.** Calculation of standard deviation and detection limit.

| Blank Readings (1)              | Emission Intensity   |
|---------------------------------|----------------------|
| Reading 1                       | $1.81 \times 10^7$   |
| Reading 2                       | $1.72 \times 10^7$   |
| Reading 3                       | $1.75 \times 10^7$   |
| Reading 4                       | $1.90 \times 10^7$   |
| Standard Deviation ( $\sigma$ ) | $0.0798 \times 10^7$ |

|                                 |                                        |
|---------------------------------|----------------------------------------|
| Slope from Graph (m)            | $3.7856 \times 10^{11} \text{ M}^{-1}$ |
| Detection Limit ( $3\sigma/m$ ) | $6.3 \mu\text{M}$ ( <b>1.4 ppm</b> )   |

Detection limit was calculated using the following equation:

$$\text{Detection limit} = 3\sigma/m$$

Where ' $\sigma$ ' is the calculated standard deviation from four blank measurements and ' $m$ ' is the slope obtained from the plot of fluorescence emission with increasing concentration of TNP.

**Table S5.** Average lifetime ( $\tau$ ) calculated for **1** before and after TNP addition.

|                     | <b>1</b> | <b>1 + 20 <math>\mu</math>L TNP</b> | <b>1 + 60 <math>\mu</math>L TNP</b> |
|---------------------|----------|-------------------------------------|-------------------------------------|
| $\chi^2$ value      | 1.27     | 1.10                                | 1.18                                |
| $\tau_1$ (ns)       | 0.187    | 0.169                               | 0.572                               |
| $\alpha_1$          | 0.368    | 0.376                               | 0.150                               |
| $\tau_2$ (ns)       | 0.714    | 0.736                               | 0.269                               |
| $\alpha_2$          | 0.246    | 0.259                               | 0.208                               |
| $\tau_3$ (ns)       | 0.098    | 0.096                               | 0.159                               |
| $\alpha_3$          | 0.865    | 0.814                               | 0.464                               |
| Average $\tau$ (ns) | 0.43     | 0.41                                | 0.27                                |

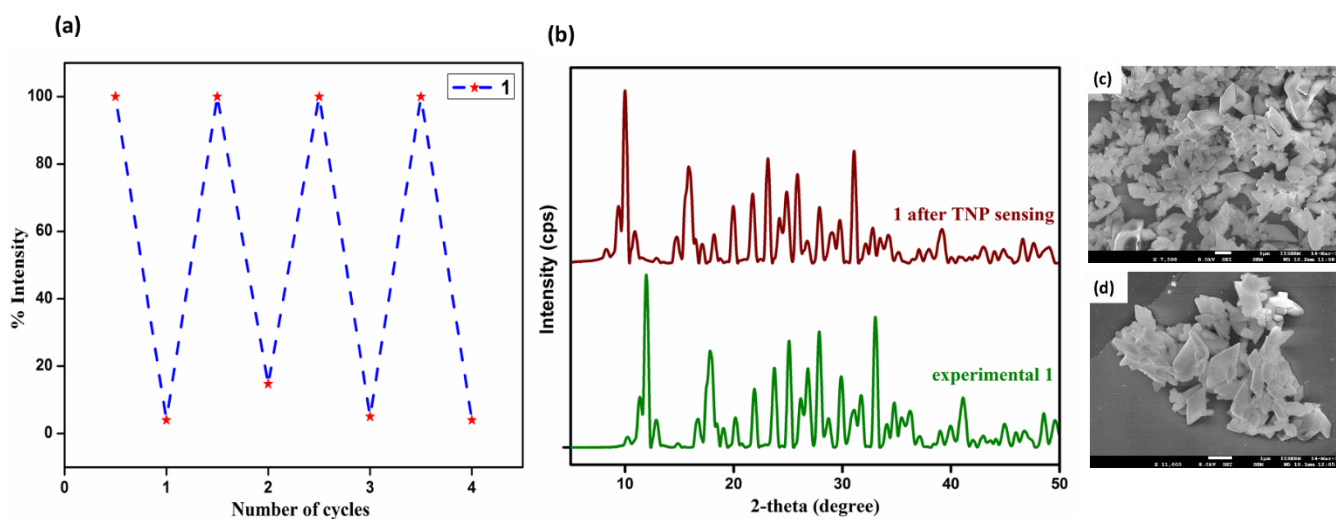

**Fig. S26** Recyclability and stability of **1**. (a) The upper dots represent the initial fluorescence intensities, and the lower dots represent the intensities upon addition of 330  $\mu$ L of the aqueous solution of TNP; (b) PXRD patterns of **1** before and after immersing in aqueous TNP solution, and FESEM images (c, d) of **1** before and after immersing in 2 mM aqueous TNP solution, respectively.

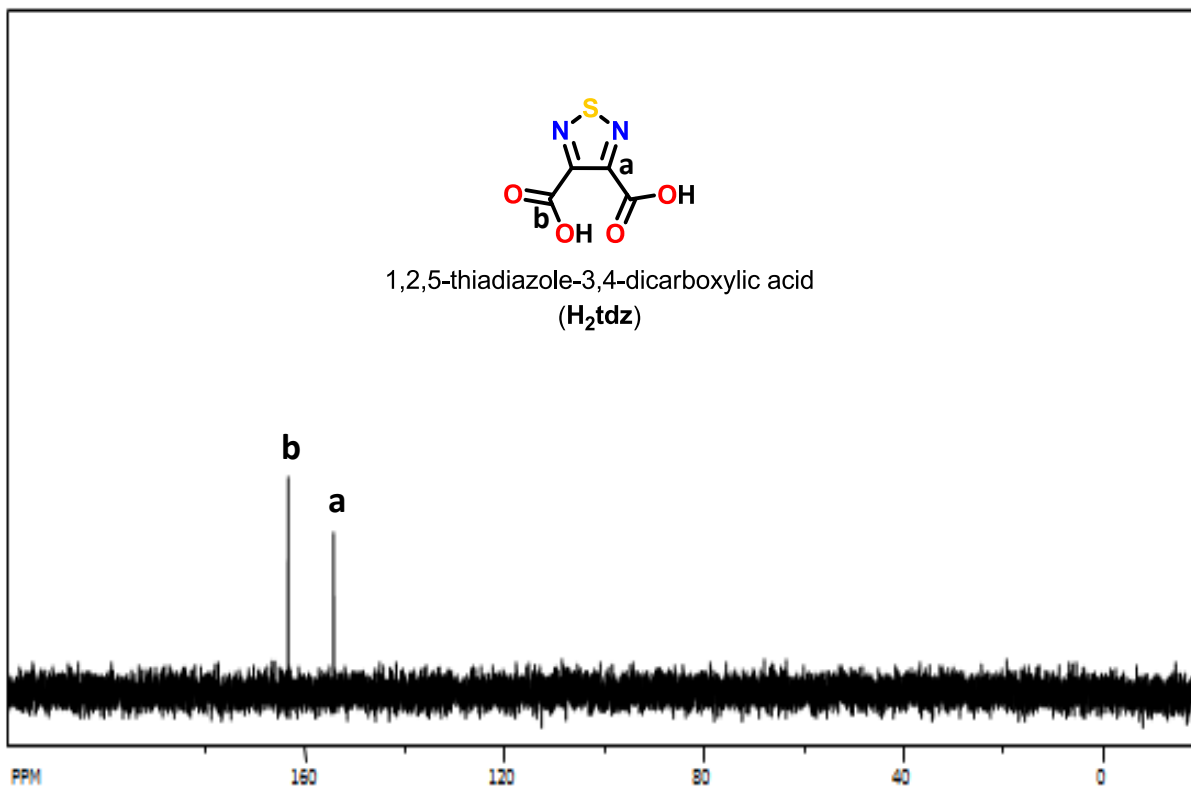

**Fig. S27** <sup>13</sup>C NMR spectrum of H<sub>2</sub>tdz in D<sub>2</sub>O.

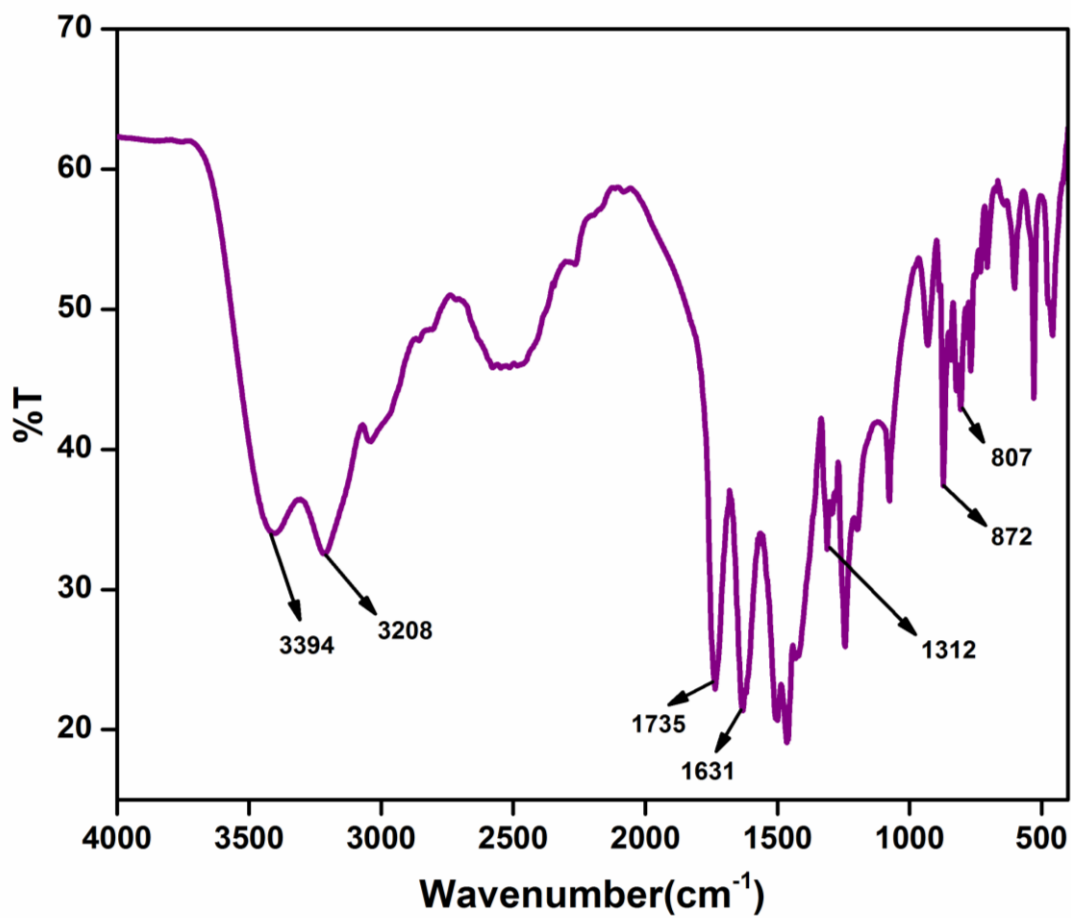

**Fig. S28** FTIR spectrum of H<sub>2</sub>tdz.

Selected FTIR Peaks (KBr, cm<sup>-1</sup>): 1735 (C=O stretch), 1631 (C=N stretch), 1312 (C-C stretch), 872 (N-S stretch), 807 (C-S stretch).
